# Supplementary material for: Pan-cancer analysis of LRRC59 with a focus on prognostic and immunological roles in hepatocellular carcinoma.
Source: publisher site journal article supplement (doi:10.18632/aging.205810), 2024-05-10
Supplement: Supplementary file [file aging-v16i9-205810-supplementary-material-SD1.pdf]

SUPPLEMENTARY FIGURES

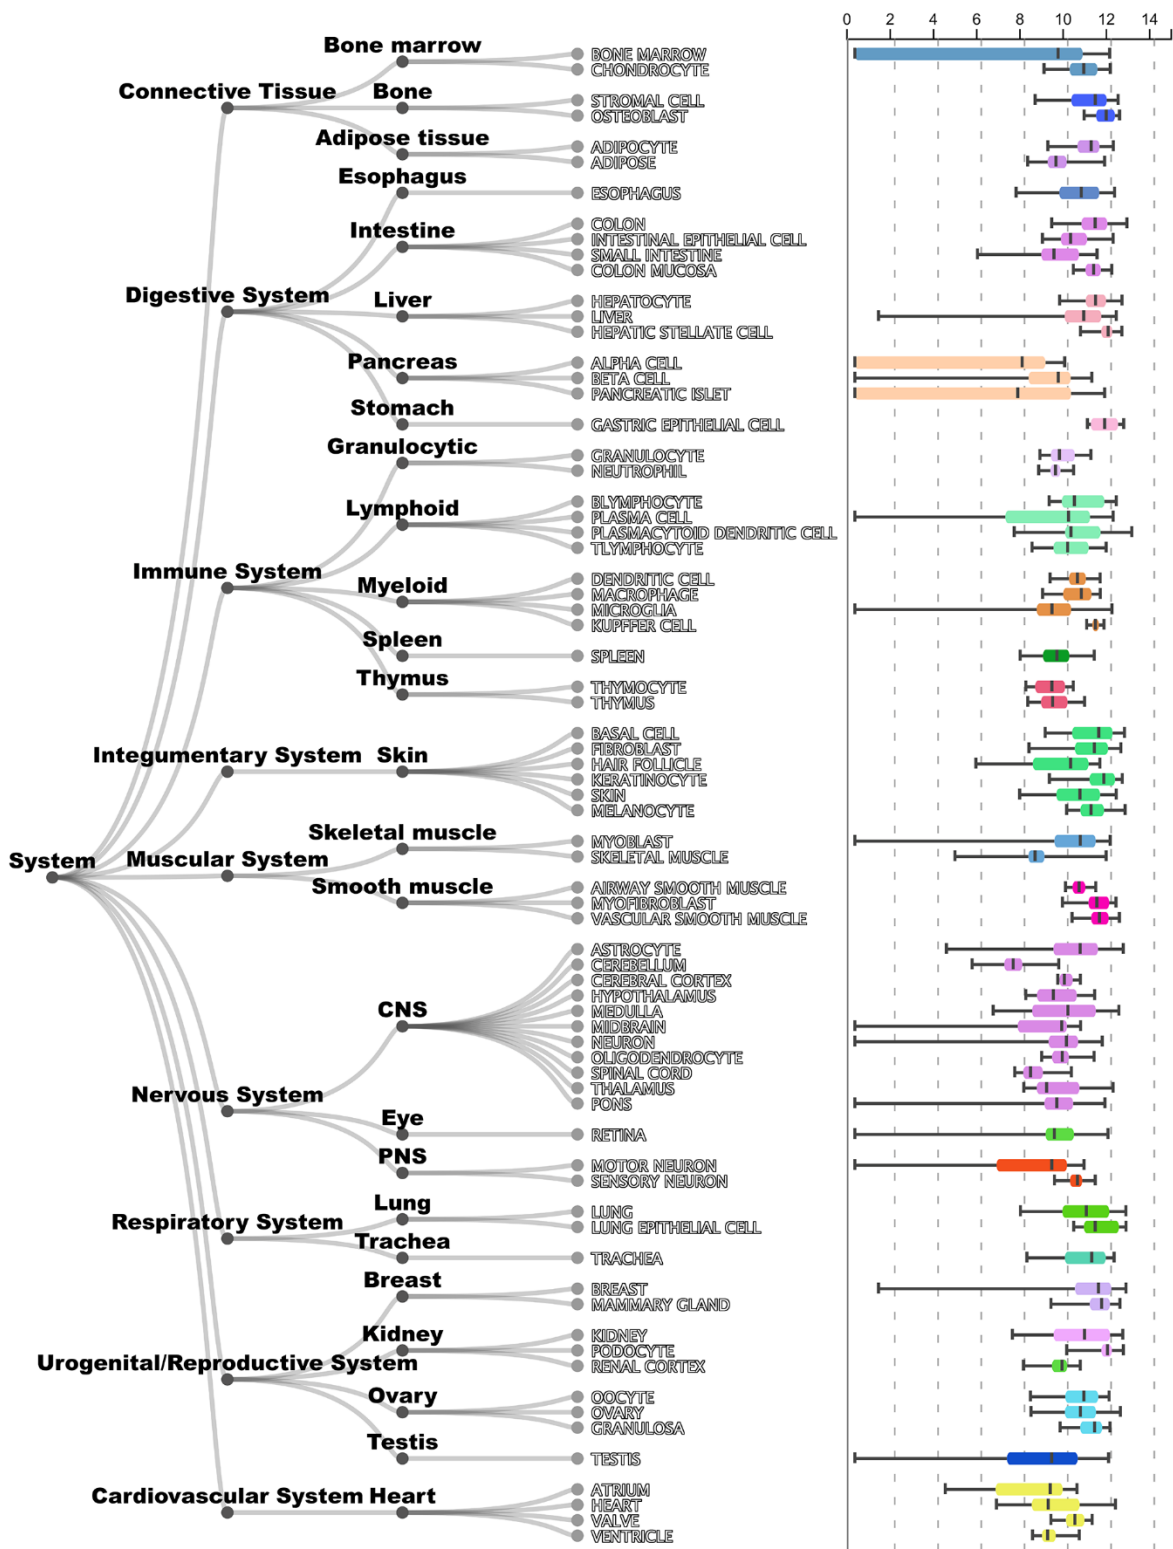

Supplementary Figure 1. The expression of LRRC59 in human normal tissues.

## Diagnostic accuracy

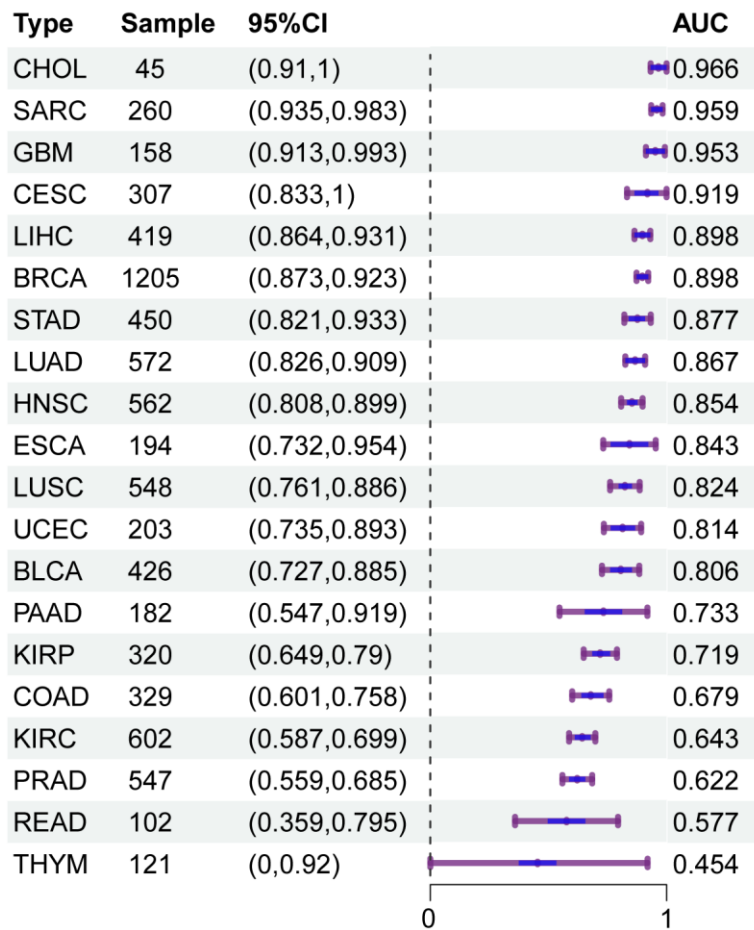

Supplementary Figure 2. The diagnostic accuracy of LRRC59 in various human tumors.

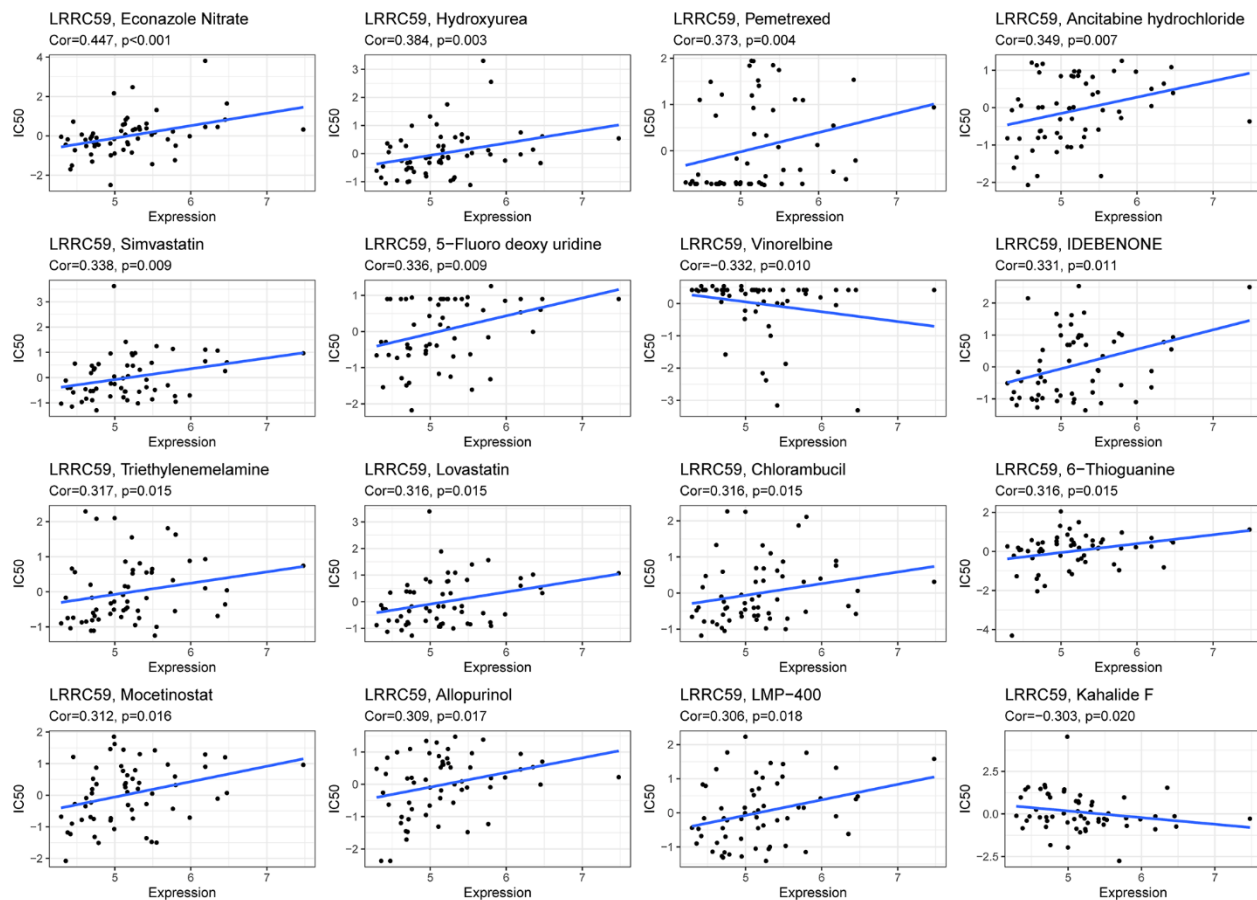

**Supplementary Figure 3. Correlation analysis between LRRC59 expression and drug sensitivity.**

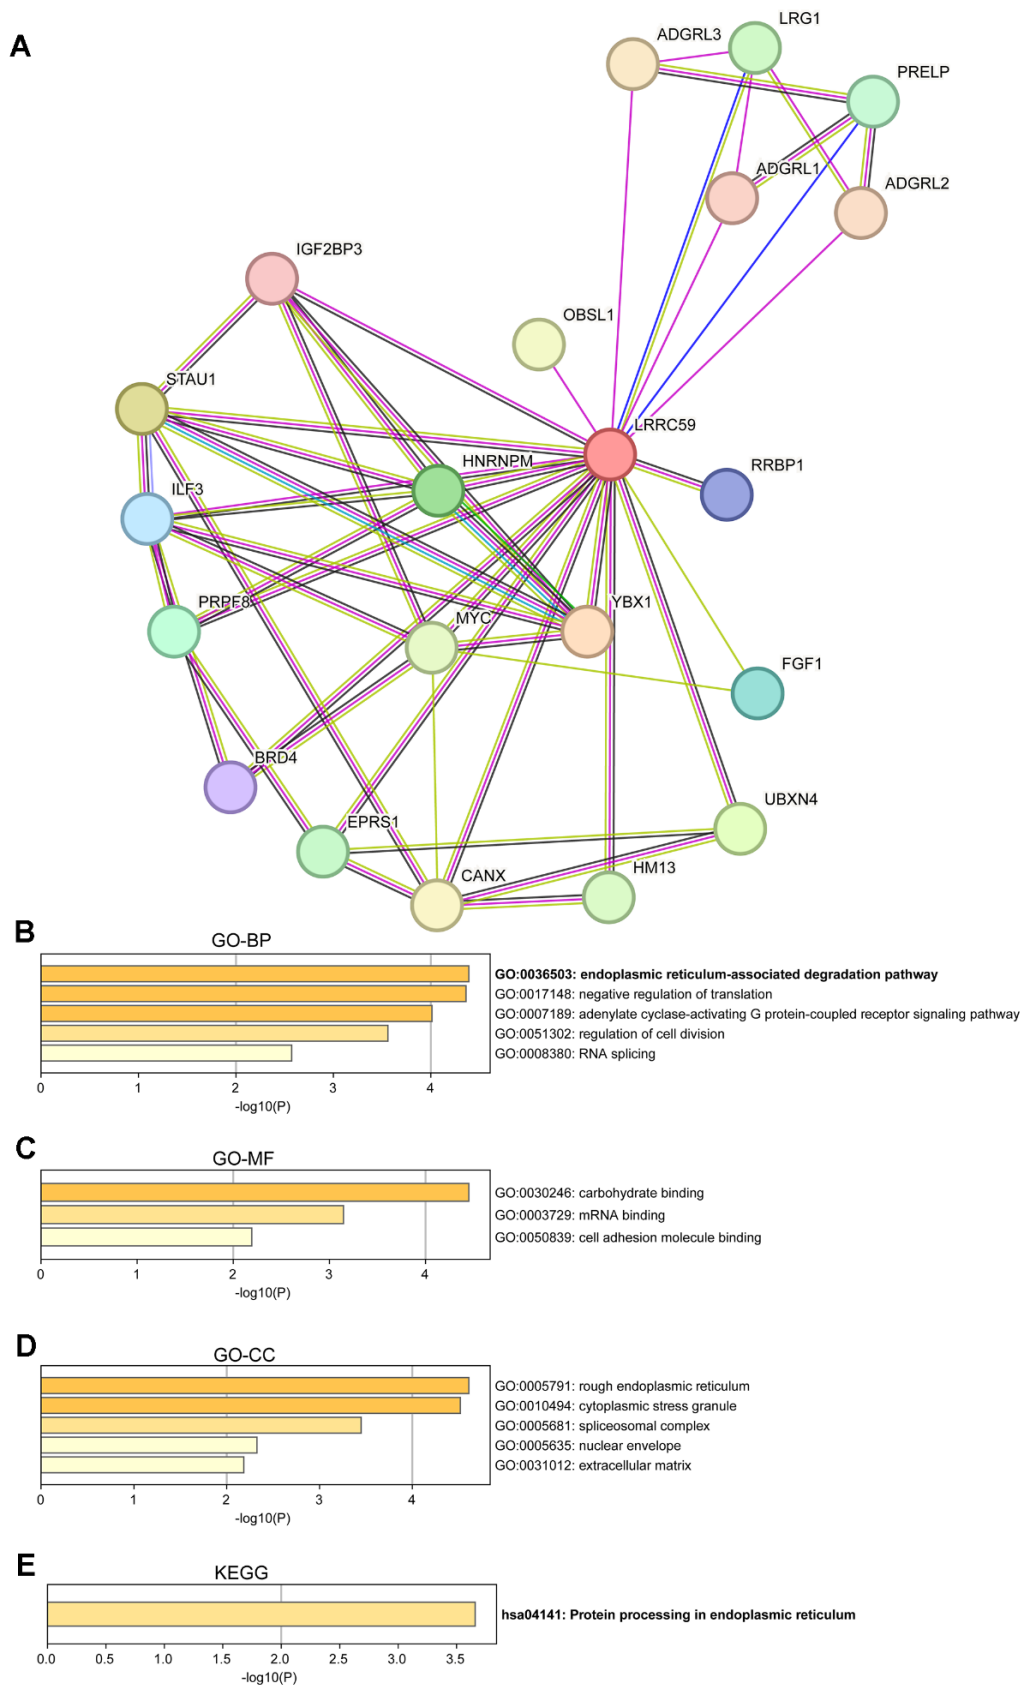

**Supplementary Figure 4. The enrichment analysis of LRRC59 and its interaction genes. (A)** LRRC59 and its 20 interacting genes from the STRING database. **(B–E)** The enrichment analysis of LRRC59 and its interaction genes.

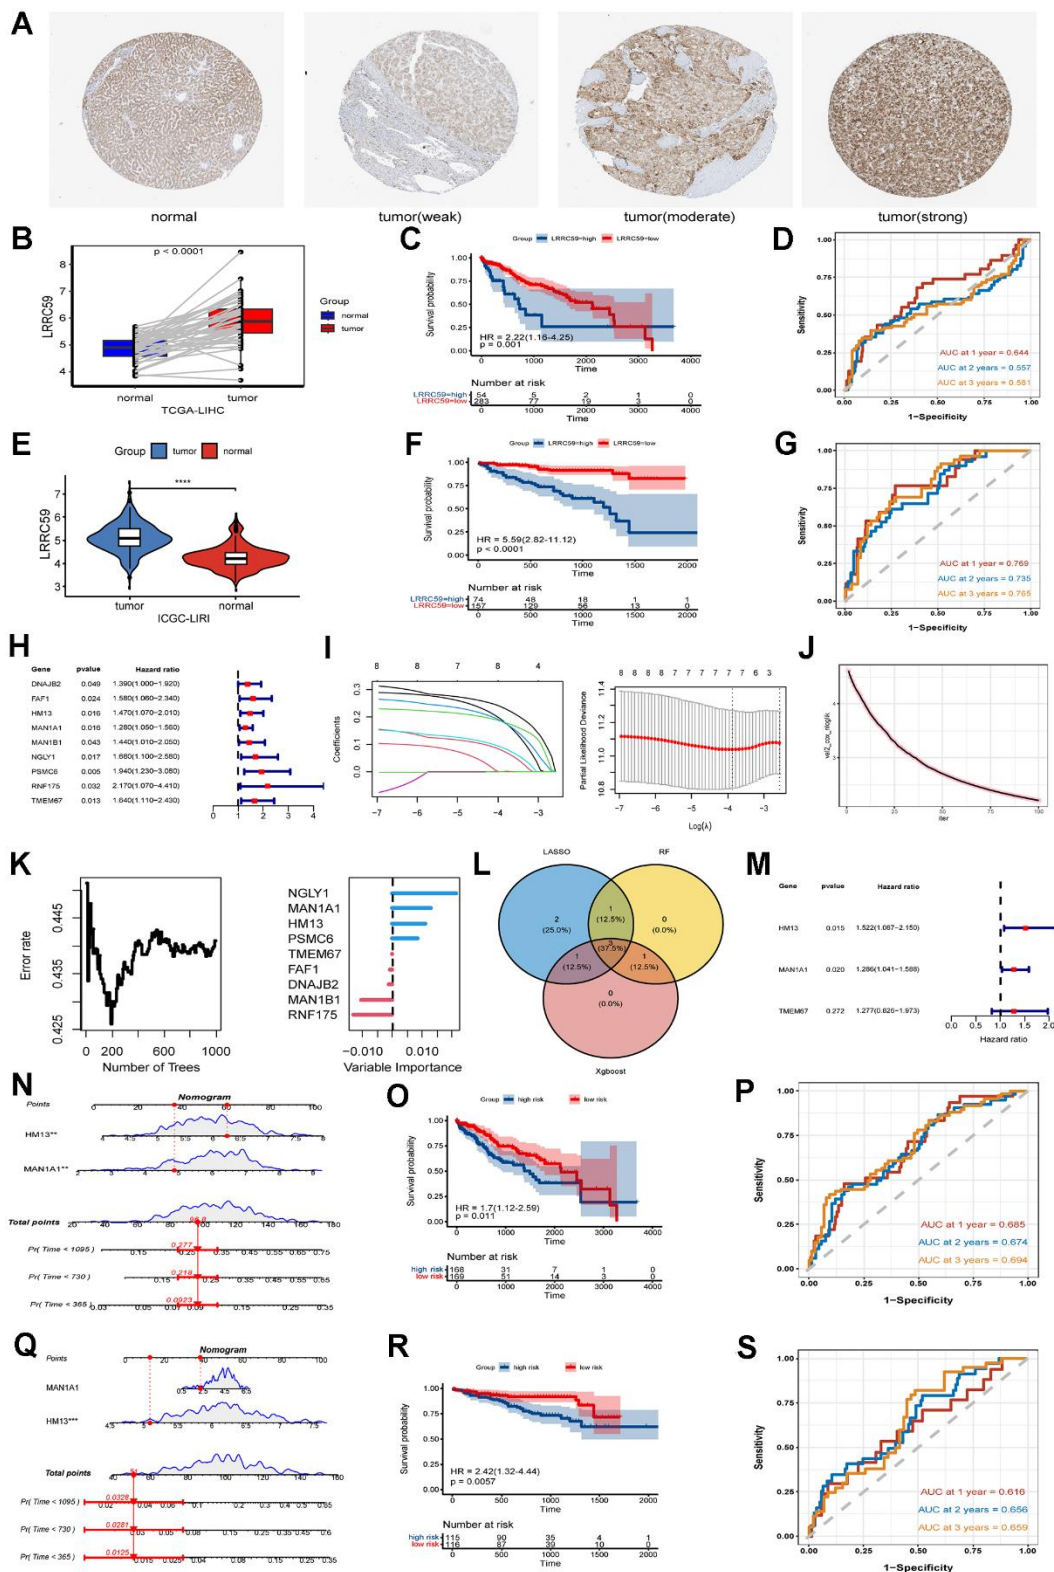

**Supplementary Figure 5. The expression and prognosis of LRRC59 in HCC.** (A) Immunohistochemical results of LRRC59 in liver normal tissues and HCC tissues. (B–D) LRRC59 paired expression analysis, prognosis analysis, and survival prediction analysis in TCGA-LIHC dataset. (E–G) LRRC59 expression analysis, prognosis analysis, and survival prediction analysis in ICGC-LIRI dataset. (H–M) Univariate Cox analysis, three machine learning algorithms, and multivariate Cox analysis were used in the TCGA-LIHC dataset to screen genes for subsequent modeled. (N–P) A predictive model was built in the TCGA-LIHC dataset and tested for the prognostic accuracy. (Q–S) A predictive model was built in the ICGC-LIRI dataset and tested for the prognostic accuracy.

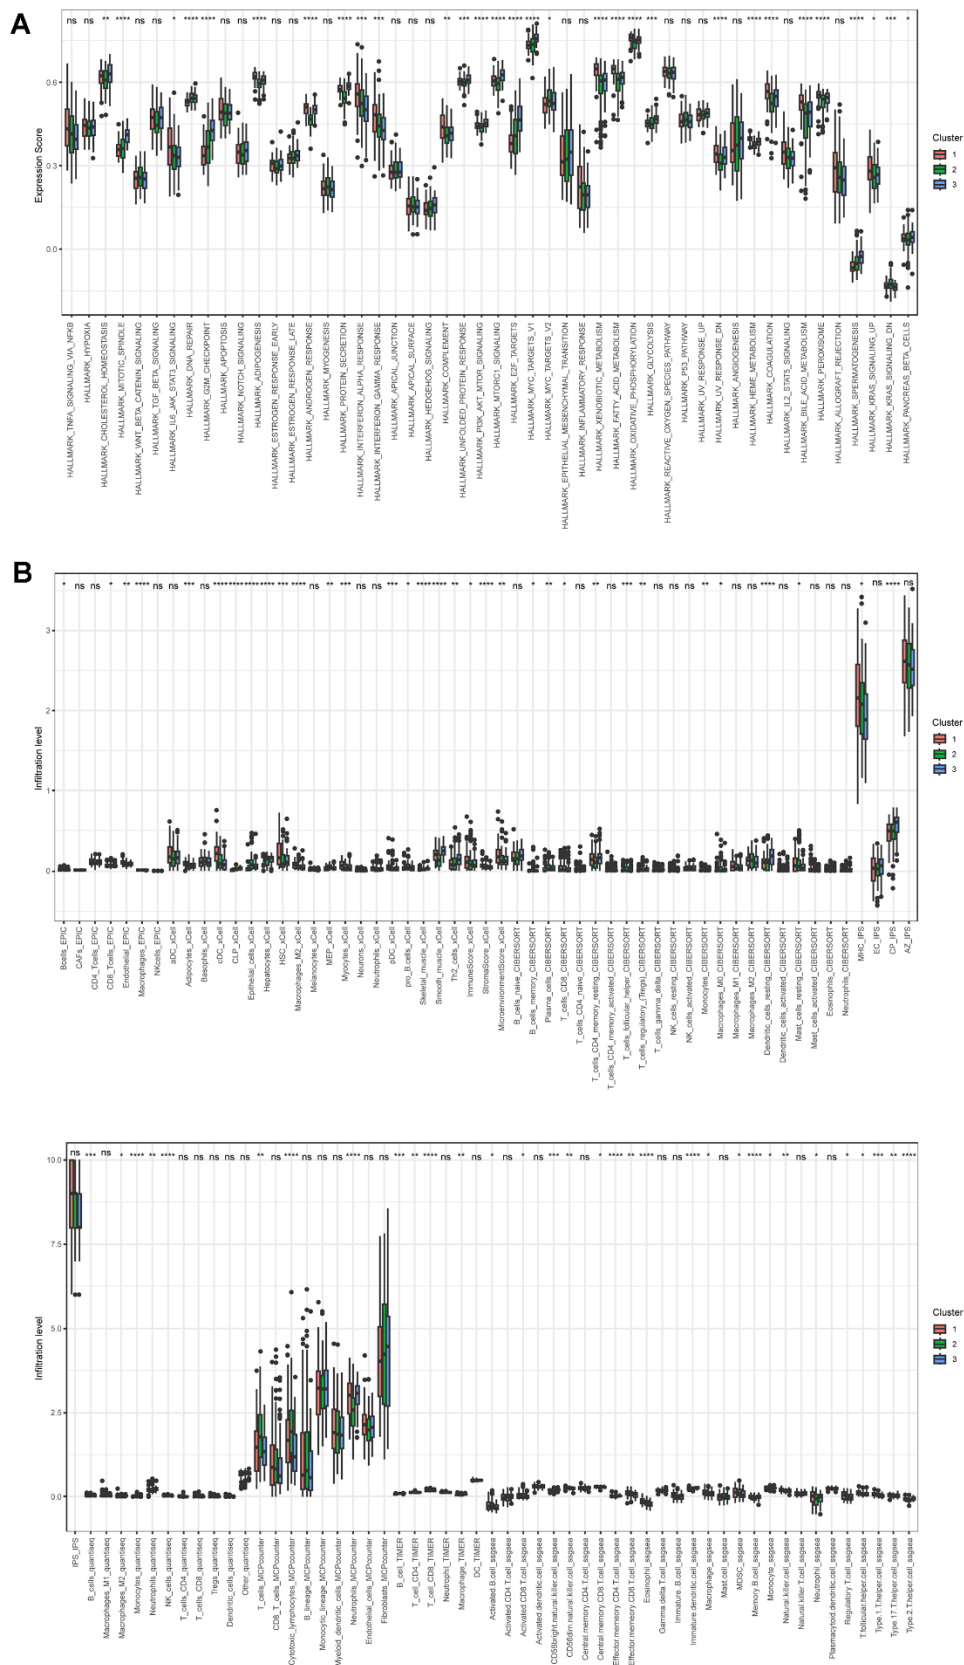

**Supplementary Figure 6. Hallmark genomic score and immune cell infiltration differences among the three HCC subtypes.** (A) Hallmark genomic score differences among the three HCC subtypes. (B) Differences in immune cell infiltration among the three HCC subtypes.



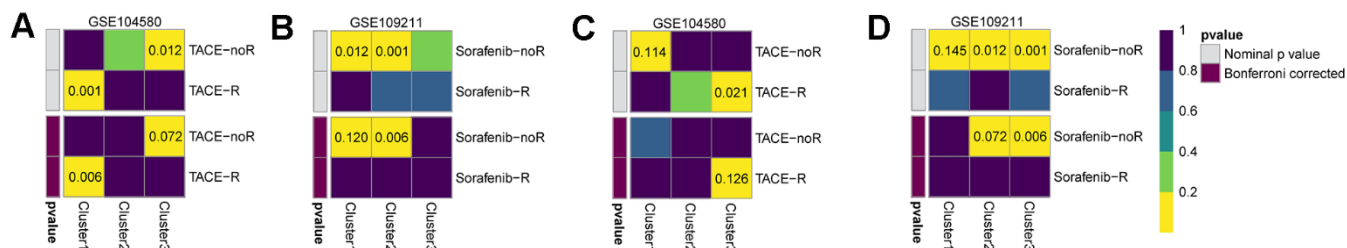

**Supplementary Figure 7. The sensitivity to TACE and Sorafenib treatment of HCC subtypes.** (A, B) Prediction of HCC subtypes and sensitivity to TACE and Sorafenib treatment in the ICGC-LIRI dataset. (C, D) Prediction of HCC subtypes and sensitivity to TACE and Sorafenib treatment in the TCGA-LIHC dataset.
